# Supplementary material
Source: PubMed Central journal article supplement (PMC5869849)
Supplement: JCM.01672-17_zjm999095891s1.pdf [file JCM.01672-17_zjm999095891s1.pdf]

Table S1: Monomicrobial identification performance (pre-discrepancy testing) for the 253 analyzable runs

| Species                 | True Positive | True Negative | False Positive | False Negative | Indeterminate | Sensitivity | Specificity | PPV   | NPV   |
|-------------------------|---------------|---------------|----------------|----------------|---------------|-------------|-------------|-------|-------|
| CNS                     | 66            | 165           | 9              | 1              | 12            | 98.5%       | 94.8%       | 88.0% | 99.4% |
| EFS                     | 8             | 243           | 0              | 0              | 2             | 100%        | 100%        | 100%  | 100%  |
| EFM                     | 3             | 248           | 2              | 0              | 0             | 100%        | 99.2%       | 60.0% | 100%  |
| SAU                     | 29            | 198           | 11             | 1              | 14            | 96.7%       | 94.7%       | 72.5% | 99.5% |
| SLU                     | 0             | 251           | 0              | 0              | 2             | N/A         | 100%        | N/A   | 100%  |
| STR                     | 12            | 234           | 7              | 0              | 0             | 100%        | 97.1%       | 63.2% | 100%  |
| ABA                     | 1             | 252           | 0              | 0              | 0             | 100%        | 100%        | 100%  | 100%  |
| CIT                     | 3             | 250           | 0              | 0              | 0             | 100%        | 100%        | 100%  | 100%  |
| ENT                     | 1             | 249           | 0              | 0              | 3             | 100%        | 100%        | 100%  | 100%  |
| ECO                     | 44            | 208           | 1              | 0              | 0             | 100%        | 99.5%       | 97.8% | 100%  |
| KLE                     | 16            | 234           | 0              | 0              | 3             | 100%        | 100%        | 100%  | 100%  |
| PRO                     | 5             | 247           | 1              | 0              | 0             | 100%        | 99.6%       | 83.3% | 100%  |
| PAE                     | 10            | 242           | 0              | 1              | 0             | 90.9%       | 100%        | 100%  | 99.6% |
| SMA                     | 6             | 247           | 0              | 0              | 0             | 100%        | 100%        | 100%  | 100%  |
| CAL                     | 3             | 249           | 1              | 0              | 0             | 100%        | 99.6%       | 75.0% | 100%  |
| CGL                     | 2             | 243           | 8              | 0              | 0             | 100%        | 96.8%       | 20.0% | 100%  |
| Gram-Positive Organisms | 118           | 1339          | 29             | 2              | 30            | 98.3%       | 97.9%       | 80.3% | 99.9% |
| Gram-Negative Organisms | 86            | 1929          | 2              | 1              | 6             | 98.9%       | 99.9%       | 97.7% | 100%  |
| All Yeast               | 5             | 492           | 9              | 0              | 0             | 100%        | 98.2%       | 35.7% | 100%  |
| All Organisms           | 209           | 3760          | 40             | 3              | 36            | 98.6%       | 99.0%       | 83.9% | 99.9% |

PPV: Positive predictive value, NPV: Negative predictive value, CNS: Coagulase Negative *Staphylococcus* spp., EFS: *Enterococcus faecalis*, EFM: *Enterococcus faecium*, SAU: *Staphylococcus aureus*, SLU: *Staphylococcus lugdunensis*, STR: *Streptococcus* spp., ABA: *Acinetobacter baumannii*, CIT: *Citrobacter* spp., ENT: *Enterobacter* spp., ECO: *Escherichia coli*, KLE: *Klebsiella* spp., PRO: *Proteus* spp., PAE: *Pseudomonas aeruginosa*, SMA: *Serratia marcescens*, CAL: *Candida albicans*, CGL: *Candida glabrata*
