# Supplementary material
Source: PubMed Central journal article supplement (PMC5869849)
Supplement: JCM.01672-17_zjm999095891s2.pdf [file JCM.01672-17_zjm999095891s2.pdf]

Table S2: Polymicrobial identification performance (pre-discrepancy testing) for the 24 analyzable runs

| Species                 | True Positive | True Negative | False Positive | False Negative | Indeterminate | Sensitivity | Specificity | PPV   | NPV   |
|-------------------------|---------------|---------------|----------------|----------------|---------------|-------------|-------------|-------|-------|
| CNS                     | 4             | 14            | 1              | 5              | 0             | 44.4%       | 93.3%       | 80.0% | 73.7% |
| EFS                     | 2             | 22            | 0              | 0              | 0             | 100%        | 100%        | 100%  | 100%  |
| EFM                     | 3             | 19            | 1              | 1              | 0             | 75.0%       | 95.0%       | 75.0% | 95.0% |
| SAU                     | 2             | 21            | 0              | 0              | 1             | 100%        | 100%        | 100%  | 100%  |
| SLU                     | 0             | 24            | 0              | 0              | 0             | N/A         | 100%        | N/A   | 100%  |
| STR                     | 3             | 19            | 2              | 0              | 0             | 100%        | 90.5%       | 60.0% | 100%  |
| ABA                     | 0             | 24            | 0              | 0              | 0             | N/A         | 100%        | N/A   | 100%  |
| CIT                     | 0             | 23            | 0              | 1              | 0             | 0%          | 100%        | N/A   | 95.8% |
| ENT                     | 1             | 20            | 0              | 0              | 3             | 100%        | 100%        | 100%  | 100%  |
| ECO                     | 2             | 21            | 1              | 0              | 0             | 100%        | 95.5%       | 66.7% | 100%  |
| KLE                     | 4             | 19            | 0              | 1              | 0             | 80.0%       | 100%        | 100%  | 95.0% |
| PRO                     | 0             | 24            | 0              | 0              | 0             | N/A         | 100%        | N/A   | 100%  |
| PAE                     | 0             | 23            | 0              | 1              | 0             | 0%          | 100%        | N/A   | 95.8% |
| SMA                     | 1             | 23            | 0              | 0              | 0             | 100%        | 100%        | 100%  | 100%  |
| CAL                     | 0             | 23            | 0              | 1              | 0             | 0%          | 100%        | N/A   | 95.8% |
| CGL                     | 0             | 24            | 0              | 0              | 0             | N/A         | 100%        | N/A   | 100%  |
| Gram-Positive Organisms | 14            | 119           | 4              | 6              | 1             | 70.0%       | 96.8%       | 77.8% | 95.2% |
| Gram-Negative Organisms | 8             | 177           | 1              | 3              | 3             | 72.7%       | 99.4%       | 88.9% | 98.3% |
| All Yeast               | 0             | 47            | 0              | 1              | 0             | 0%          | 100%        | N/A   | 97.9% |
| All Organisms           | 22            | 343           | 5              | 10             | 4             | 68.8%       | 98.6%       | 81.5% | 97.2% |

PPV: Positive predictive value, NPV: Negative predictive value, CNS: Coagulase Negative *Staphylococcus* spp., EFS: *Enterococcus faecalis*, EFM: *Enterococcus faecium*, SAU: *Staphylococcus aureus*, SLU: *Staphylococcus lugdunensis*, STR: *Streptococcus* spp., ABA: *Acinetobacter baumannii*, CIT: *Citrobacter* spp., ENT: *Enterobacter* spp., ECO: *Escherichia coli*, KLE: *Klebsiella* spp., PRO: *Proteus* spp., PAE: *Pseudomonas aeruginosa*, SMA: *Serratia marcescens*, CAL: *Candida albicans*, CGL: *Candida glabrata*
