# Supplementary material
Source: PubMed Central journal article supplement (PMC5869849)
Supplement: JCM.01672-17_zjm999095891s3.pdf [file JCM.01672-17_zjm999095891s3.pdf]

Table S3: Organisms Seen in Polymicrobial Blood Cultures

|    | SOC Result                                                           | AXDX Result                   | Discrepancy Type | Resolution |
|----|----------------------------------------------------------------------|-------------------------------|------------------|------------|
| 1  | <i>E. cloacae</i> , <i>K. pneumoniae</i>                             | KLE, ENT (Indeterminate)      | None             | N/A        |
| 2  | <i>S. epidermidis</i> , <i>Bacillus</i> spp.                         | CNS                           | None             | N/A        |
| 3  | <i>C. albicans</i> , GPR                                             | Off-panel organism            | CAL FN           | SOC        |
| 4  | GPC, GPR                                                             | CNS, SAU (Indeterminate)      | CNS FP           | SOC        |
| 5  | Viridans streptococci, CNS                                           | STR, CNS                      | STR FP           | AXDX       |
| 6  | GPR, CNS                                                             | CNS                           | None             | N/A        |
| 7  | <i>E. aerogenes</i> , <i>E. faecium</i>                              | ENT                           | EFM FN           | SOC        |
| 8  | <i>S. epidermidis</i> , <i>P. aeruginosa</i>                         | CNS                           | PAE FN           | SOC        |
| 9  | <i>S. marcescens</i> , CNS                                           | SMA                           | CNS FN           | AXDX       |
| 10 | <i>S. aureus</i> , <i>Bacillus</i> spp.                              | SAU                           | None             | N/A        |
| 11 | <i>K. pneumoniae</i> , <i>F. necrophorum</i>                         | Off-panel organism            | KLE FN           | SOC        |
| 12 | <i>E. faecium</i> , CNS                                              | EFM                           | CNS FN           | AXDX       |
| 13 | <i>E. cloacae</i> , <i>K. oxytoca</i> , <i>E. faecium</i>            | EFM, KLE, ENT (Indeterminate) | None             | N/A        |
| 14 | <i>C. freundii</i> , <i>Lactobacillus</i> spp.                       | ENT (Indeterminate)           | CIT FN           | SOC        |
| 15 | <i>K. pneumoniae</i> , <i>E. faecalis</i>                            | EFS, KLE                      | None             | N/A        |
| 16 | <i>Moraxella</i> spp., <i>Corynebacterium</i> spp.                   | EFM                           | EFM FP           | SOC        |
| 17 | <i>S. salivarius</i> , <i>S. haemolyticus</i> , <i>S. agalactiae</i> | STR                           | CNS FN           | SOC        |
| 18 | <i>E. coli</i> , <i>S. anginosus</i>                                 | ECO                           | None             | N/A        |
| 19 | Viridans streptococci, <i>S. epidermidis</i>                         | STR                           | CNS FN           | SOC        |
| 20 | <i>E. faecalis</i> , <i>E. avium</i> , CNS                           | EFS                           | CNS FN           | SOC        |
| 21 | Viridans streptococci, <i>E. coli</i>                                | ECO                           | None             | N/A        |
| 22 | <i>K. pneumoniae</i> , <i>M. morgani</i>                             | ECO, KLE                      | ECO FP           | SOC        |
| 23 | <i>S. mitis/oralis</i> , <i>E. faecium</i>                           | EFM, STR                      | None             | N/A        |
| 24 | <i>S. aureus</i> , <i>S. agalactiae</i>                              | SAU, STR                      | None             | N/A        |

SOC: Standard of Care, GPC: Gram-positive coccus, GPR: Gram-positive rod, CNS: Coagulase-negative *Staphylococcus* spp., KLE: *Klebsiella* spp., ENT: *Enterobacter* spp., SAU: *Staphylococcus aureus*, STR: *Streptococcus* spp., SMA: *Serratia marcescens*, EFM: *E. faecium*, EFS: *E. faecalis*, ECO: *E. coli*, CAL: *C. albicans*, PAE: *P. aeruginosa*, FN: false negative, FP: false positive, AXDX: Accelerate Pheno™ system, None: No discrepancy, N/A: not applicable
