# Supplementary material
Source: PubMed Central journal article supplement (PMC5869849)
Supplement: JCM.01672-17_zjm999095891s4.pdf [file JCM.01672-17_zjm999095891s4.pdf]

Table S4: Organisms identified by standard of care but not present on the Accelerate PhenoTest™ BC kit

| Microorganism                       | Number Identified |
|-------------------------------------|-------------------|
| <i>Achromobacter</i> spp.           | 1                 |
| <i>Aeromonas</i> spp.               | 1                 |
| <i>Bacillus</i> spp.                | 7                 |
| <i>Bacteroides fragilis</i>         | 3                 |
| <i>Candida parapsilosis</i>         | 2                 |
| <i>Clostridium</i> spp.             | 2                 |
| <i>Corynebacterium</i> spp.         | 5                 |
| <i>Cryptococcus neoformans</i>      | 1                 |
| <i>Dysgonomonas gadei</i>           | 1                 |
| <i>Enterococcus avium</i>           | 1                 |
| <i>Fusobacterium</i> spp.           | 3                 |
| <i>Haemophilus influenzae</i>       | 1                 |
| <i>Lactobacillus</i> spp.           | 3                 |
| <i>Micrococcus</i> spp.             | 2                 |
| <i>Moraxella</i> spp.               | 1                 |
| <i>Morganella morganii</i>          | 1                 |
| <i>Neisseria</i> spp.               | 1                 |
| <i>Propionibacterium acnes</i>      | 1                 |
| <i>Salmonella</i> spp.              | 1                 |
| <i>Shigella flexneri</i>            | 1                 |
| <i>Staphylococcus saprophyticus</i> | 2                 |
| <i>Streptococcus anginosus</i>      | 2                 |
| <i>Streptococcus pyogenes</i>       | 3                 |
| Total                               | 46                |
