# Supplementary material
Source: PubMed Central journal article supplement (PMC5869849)
Supplement: JCM.01672-17_zjm999095891s5.pdf [file JCM.01672-17_zjm999095891s5.pdf]

Table S5: Discrepancy Analysis for Identification Errors

| Discrepant Results       | Number | Discrepancy Resolution |                  | Comments                                                                                                                                                                  |
|--------------------------|--------|------------------------|------------------|---------------------------------------------------------------------------------------------------------------------------------------------------------------------------|
|                          |        | Resolved to SOC        | Resolved to AXDX |                                                                                                                                                                           |
|                          |        |                        |                  | <b>Bolded items were resolved in favor of AXDX</b>                                                                                                                        |
| False Positive Organisms | 45     | 39                     | 6                |                                                                                                                                                                           |
| CNS                      | 10     | 10                     | 0                | 2 <i>S. saprophyticus</i> ; 2 <i>S. aureus</i> ; 1 <i>S. pyogenes</i> ; 2 <i>S. pneumoniae</i> ; 1 <i>C. parapsilosis</i> ; 1 viridans streptococci; 1 anaerobic GPC      |
| EFM                      | 3      | 3                      | 0                | 1 <i>Streptococcus lutetiensis</i> ; 1 <i>Serratia marcescens</i> ; 1 <i>Moraxella</i> spp.                                                                               |
| SAU                      | 11     | 11                     | 0                | 6 <i>Staphylococcus epidermidis</i> ; 1 <i>S. hominis</i> ; 1 <i>S. caprae</i> ; 1 <i>E. coli</i> ; 1 <i>Enterococcus faecalis</i> ; 1 <i>Streptococcus pneumoniae</i>    |
| STR                      | 9      | 3                      | 6                | <b>6 viridans streptococci were <i>Streptococcus mitis/oralis</i></b> ; 1 <i>S. anginosus</i> ; 1 <i>S. pyogenes</i> ; 1 <i>S. lutetiensis</i>                            |
| ECO                      | 2      | 2                      | 0                | 1 <i>Shigella flexneri</i> ; 1 <i>Morganella morganii</i>                                                                                                                 |
| PRO                      | 1      | 1                      | 0                | 1 <i>Staphylococcus aureus</i>                                                                                                                                            |
| CAL                      | 1      | 1                      | 0                | 1 <i>Enterococcus faecalis</i>                                                                                                                                            |
| CGL                      | 8      | 8                      | 0                | 3 <i>E. coli</i> ; 1 <i>Proteus mirabilis</i> ; 1 <i>K. pneumoniae</i> ; 1 <i>Fusobacterium necrophorum</i> ; 1 <i>Bacillus</i> spp.; 1 <i>Staphylococcus epidermidis</i> |
| False Negative Organisms | 13     | 10                     | 3                |                                                                                                                                                                           |
| CNS                      | 6      | 3                      | 3                | <b>1 <i>Staphylococcus caprae</i>; 1 <i>S. cohnii</i>; 1 <i>S. lentus</i></b> ; 2 <i>S. epidermidis</i> ; 1 <i>S. haemolyticus</i>                                        |
| EFM                      | 1      | 1                      | 0                | 1 <i>Enterococcus faecium</i>                                                                                                                                             |
| SAU                      | 1      | 1                      | 0                | 1 <i>Staphylococcus aureus</i>                                                                                                                                            |
| CIT                      | 1      | 1                      | 0                | 1 <i>Citrobacter freundii</i>                                                                                                                                             |
| KLE                      | 1      | 1                      | 0                | 1 <i>Klebsiella pneumoniae</i>                                                                                                                                            |
| PAE                      | 2      | 2                      | 0                | 2 <i>Pseudomonas aeruginosa</i>                                                                                                                                           |
| CAL                      | 1      | 1                      | 0                | 1 <i>Candida albicans</i>                                                                                                                                                 |
| Total                    | 58     | 49                     | 9                |                                                                                                                                                                           |

CNS: Coagulase Negative *Staphylococcus* spp., EFM: *Enterococcus faecium*, SAU: *Staphylococcus aureus*, STR: *Streptococcus* spp., ECO: *Escherichia coli*, PRO: *Proteus* spp., CAL: *Candida albicans*, CGL: *Candida glabrata*, CIT: *Citrobacter* spp., KLE: *Klebsiella* spp., PAE: *Pseudomonas aeruginosa*, SOC: Standard of Care, AXDX: Accelerate Pheno™ system, GPC: Gram-positive cocci
