# Supplementary material
Source: PubMed Central journal article supplement (PMC5869849)
Supplement: JCM.01672-17_zjm999095891s6.pdf [file JCM.01672-17_zjm999095891s6.pdf]

Table S6: Discrepancy Analysis for AST Very Major and Major Errors

|    | Error Type | Organism | Drug | SOC MIC (µg/mL)<br>(Interpretation) | AXDX MIC (µg/mL)<br>(Interpretation) | Resolved MIC (µg/mL)<br>(Interpretation) | Adjudication |
|----|------------|----------|------|-------------------------------------|--------------------------------------|------------------------------------------|--------------|
| 1  | VME        | EFM      | VAN  | 32 (R)                              | 2 (S)                                | 64 (R)                                   | SOC          |
| 2  | VME        | EFM      | DAP  | 8 (NS)                              | 1 (S)                                | 2 (S)                                    | AXDX         |
| 3  | VME        | CNS      | MLSb | Positive (R)                        | Negative (S)                         | Positive (R)                             | SOC          |
| 4  | VME        | CNS      | MRS  | Positive (R)                        | Negative (S)                         | Positive (R)                             | SOC          |
| 5  | VME        | PRO      | ATM  | 16 (R)                              | 2 (S)                                | ≤ 1 (S)                                  | AXDX         |
| 6  | VME        | KLE      | FEP  | > 16 (R)                            | 1 (S)                                | ≤ 1 (S)                                  | AXDX         |
| 7  | VME        | KLE      | TZP  | 128 (R)                             | 16 (S)                               | 256 (R)                                  | SOC          |
| 8  | VME        | ECO      | FEP  | > 16 (R)                            | 2 (S)                                | 2 (S)                                    | AXDX         |
| 9  | VME        | SMA      | TZP  | 128 (R)                             | 16 (S)                               | 1 (S)                                    | AXDX         |
| 10 | VME        | SMA      | CAZ  | 32 (R)                              | 2 (S)                                | 0.125 (S)                                | AXDX         |
| 11 | VME        | SMA      | ATM  | 32 (R)                              | 4 (S)                                | 0.125 (S)                                | AXDX         |
| 12 | VME        | ECO      | TZP  | 128 (R)                             | 16 (S)                               | 128 (R)                                  | SOC          |
| 13 | ME         | CNS      | MLSb | Negative (S)                        | Positive (R)                         | Negative (S)                             | SOC          |
| 14 | ME         | CNS      | MRS  | Negative (S)                        | Positive (R)                         | Positive (R)                             | AXDX         |
| 15 | ME         | ENT      | CAZ  | 1 (S)                               | 16 (R)                               | 0.5 (S)                                  | SOC          |
| 16 | ME         | ENT      | ATM  | 4 (S)                               | 16 (R)                               | 0.125 (S)                                | SOC          |
| 17 | ME         | ENT      | CAZ  | 1 (S)                               | 16 (R)                               | 0.25 (S)                                 | SOC          |

VME: Very Major Error, ME: Major Error, EFM: *Enterococcus faecium*, CNS: Coagulase Negative *Staphylococcus* spp., PRO: *Proteus* spp., KLE: *Klebsiella* spp., ECO: *Escherichia coli*, SMA: *Serratia marcescens*, ENT: *Enterobacter* spp., VAN: Vancomycin, DAP: Daptomycin, MLSb: macrolide-lincosamide-streptogramin B resistance, MRS: Methicillin-resistant *Staphylococcus*, ATM: Aztreonam, FEP: Cefepime, TZP: Piperacillin-tazobactam, CAZ: Ceftazidime, R: Resistant, S: Susceptible, NS: Non-susceptible, SOC: Standard of Care, AXDX: Accelerate Pheno™ system
